# Supplementary material for: A facile synthesis of a highly water-soluble and selective fluorescent sensor towards zinc ions derived from β-cyclodextrin based on an unexpected sensing process
Source: Royal Society of Chemistry journal article supplement (doi:10.1039/c5ra21038k), 2015-01-01
Supplement: c5ra21038k1.pdf [file c5ra21038k1.pdf]

**Facile synthesis of highly water-soluble and selective fluorescent sensor toward zinc ion derived from  $\beta$ -cyclodextrin based on unexpected sensing process**

Zengchen Liu,<sup>\*a</sup> Weijie Yang,<sup>a</sup> Yanxia Li,<sup>a</sup> Fengshou Tian,<sup>a</sup> Wenping Zhu<sup>a</sup>

*<sup>a</sup>College of Chemistry and Chemical Engineering and The Key Laboratory of Rare Earth Functional Materials and Applications, Zhoukou Normal University, Zhoukou 466001, PR China*

Corresponding author. Tel.: +86 0394 8718252; Fax: +86 0394 8178252.

E-mail address: [liuzengchen@zkn.edu.cn](mailto:liuzengchen@zkn.edu.cn)

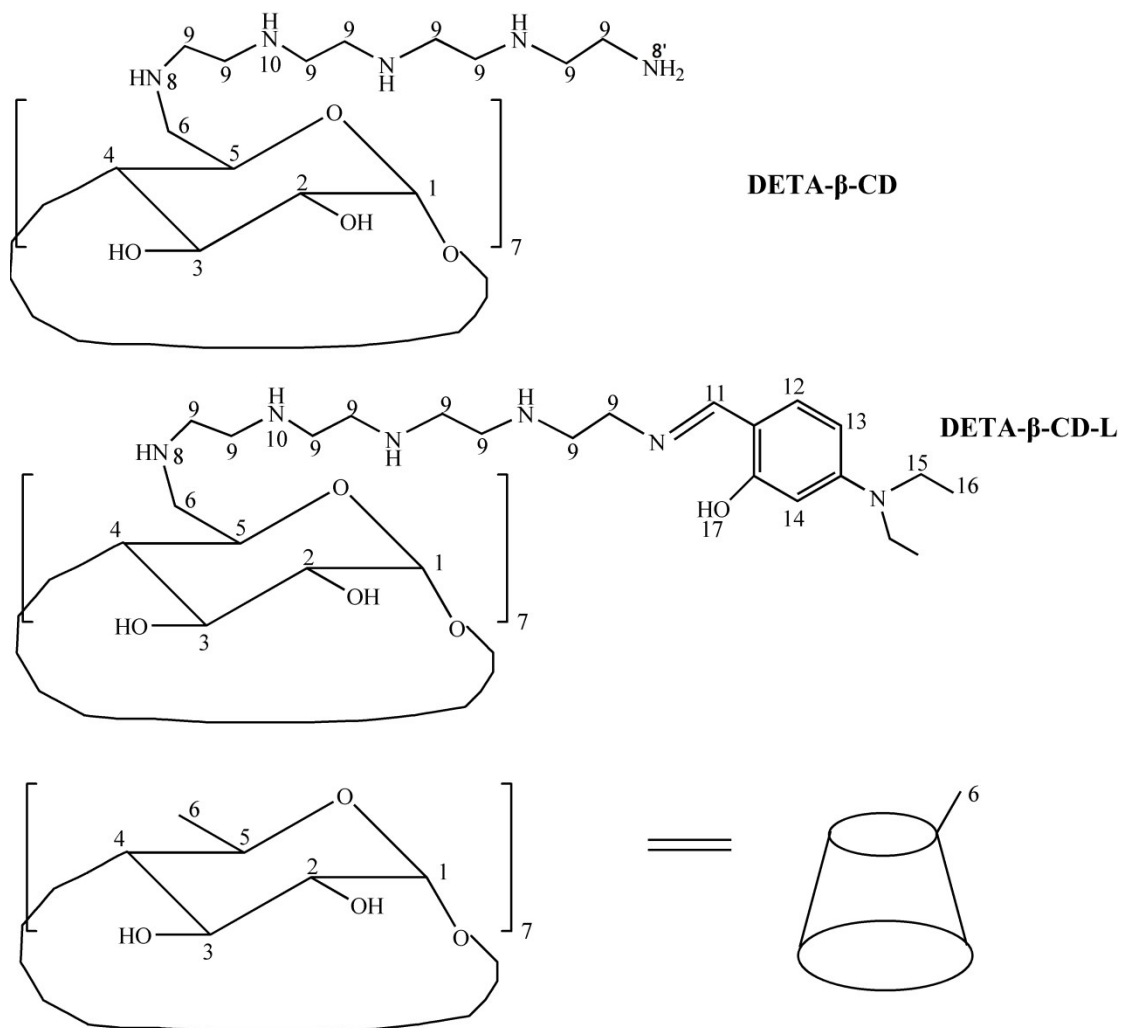

**Scheme. S1** The abbreviation of the molecules structures.

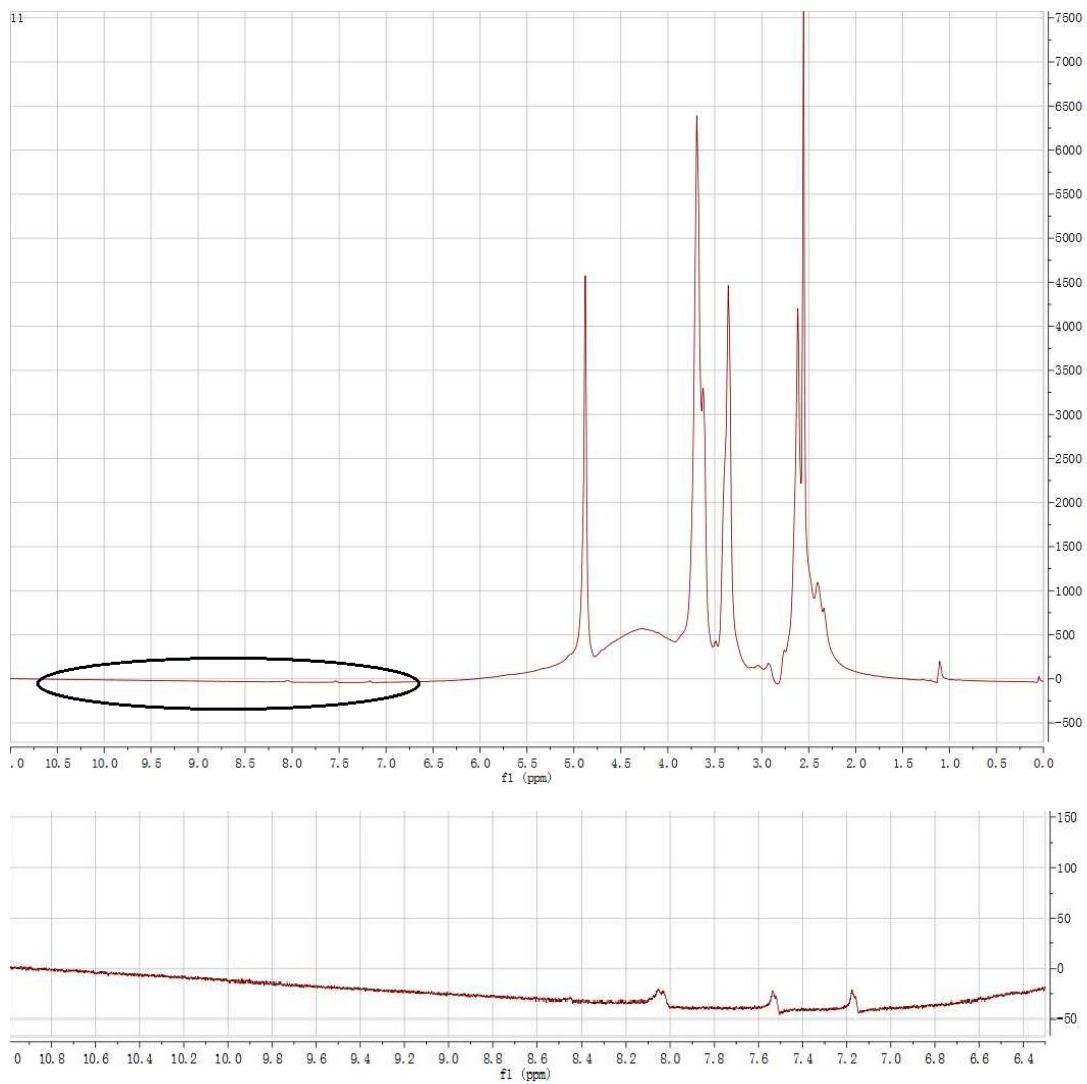

**Fig. S1** The  $^1\text{H}$ NMR spectrum of TEPA- $\beta$ -CD

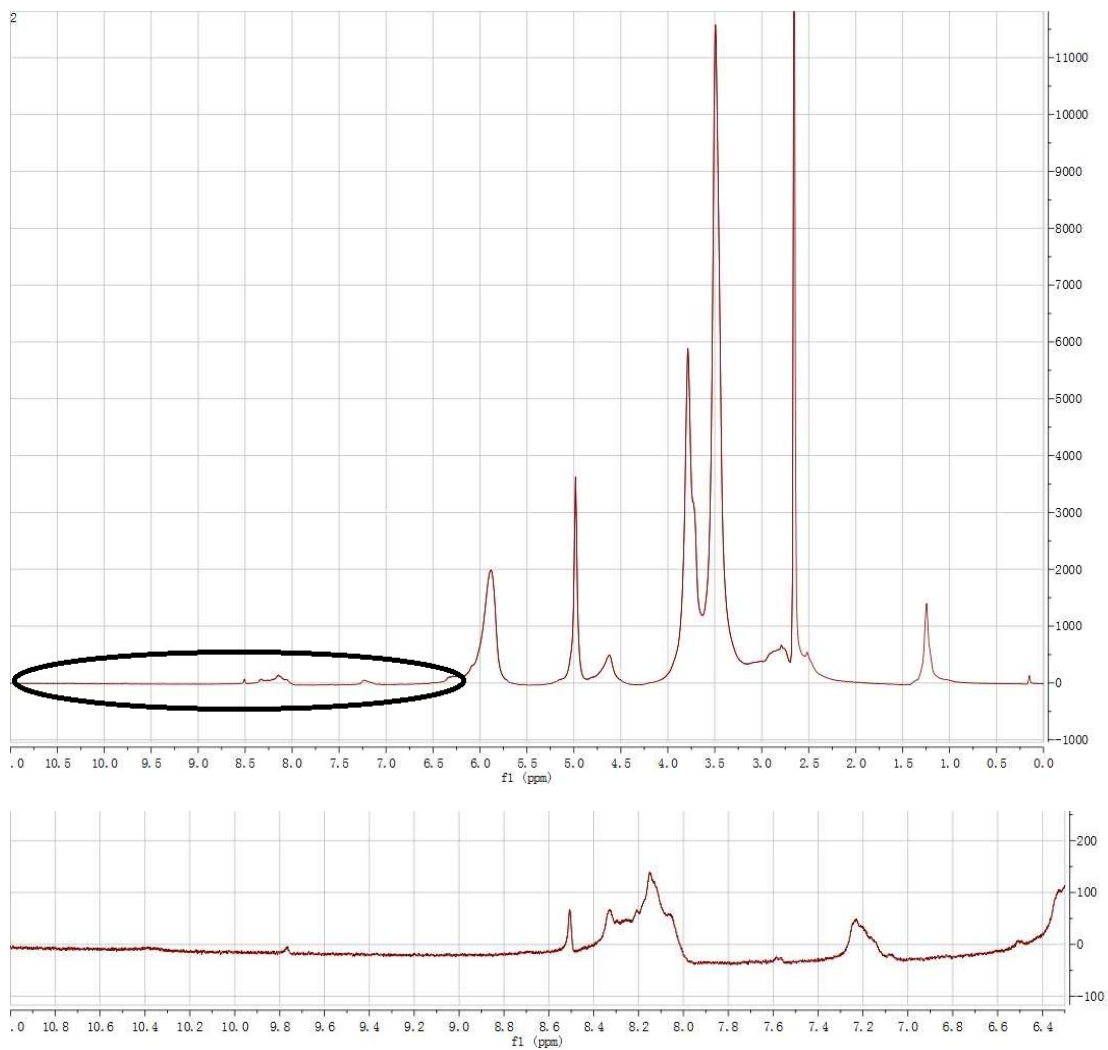

**Fig. S2** The <sup>1</sup>H NMR spectrum of TEPA-β-CD-L

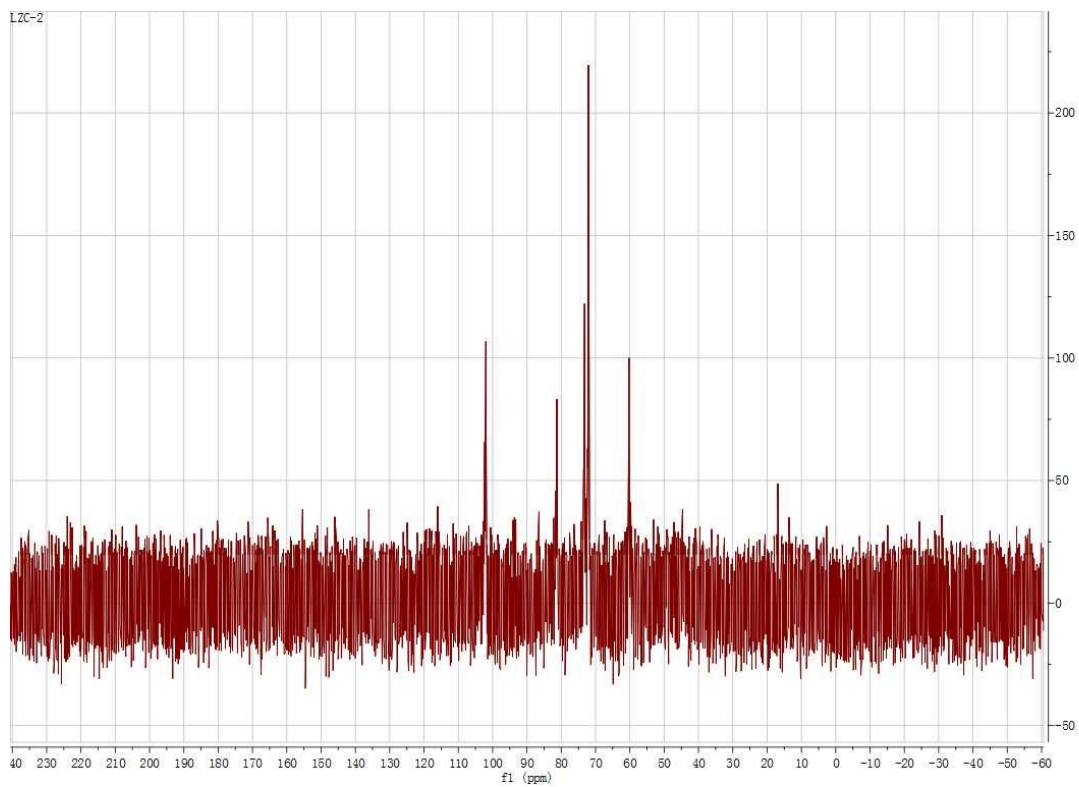

**Fig. S3** The  $^{13}\text{C}$ NMR spectrum of TEPA- $\beta$ -CD-L

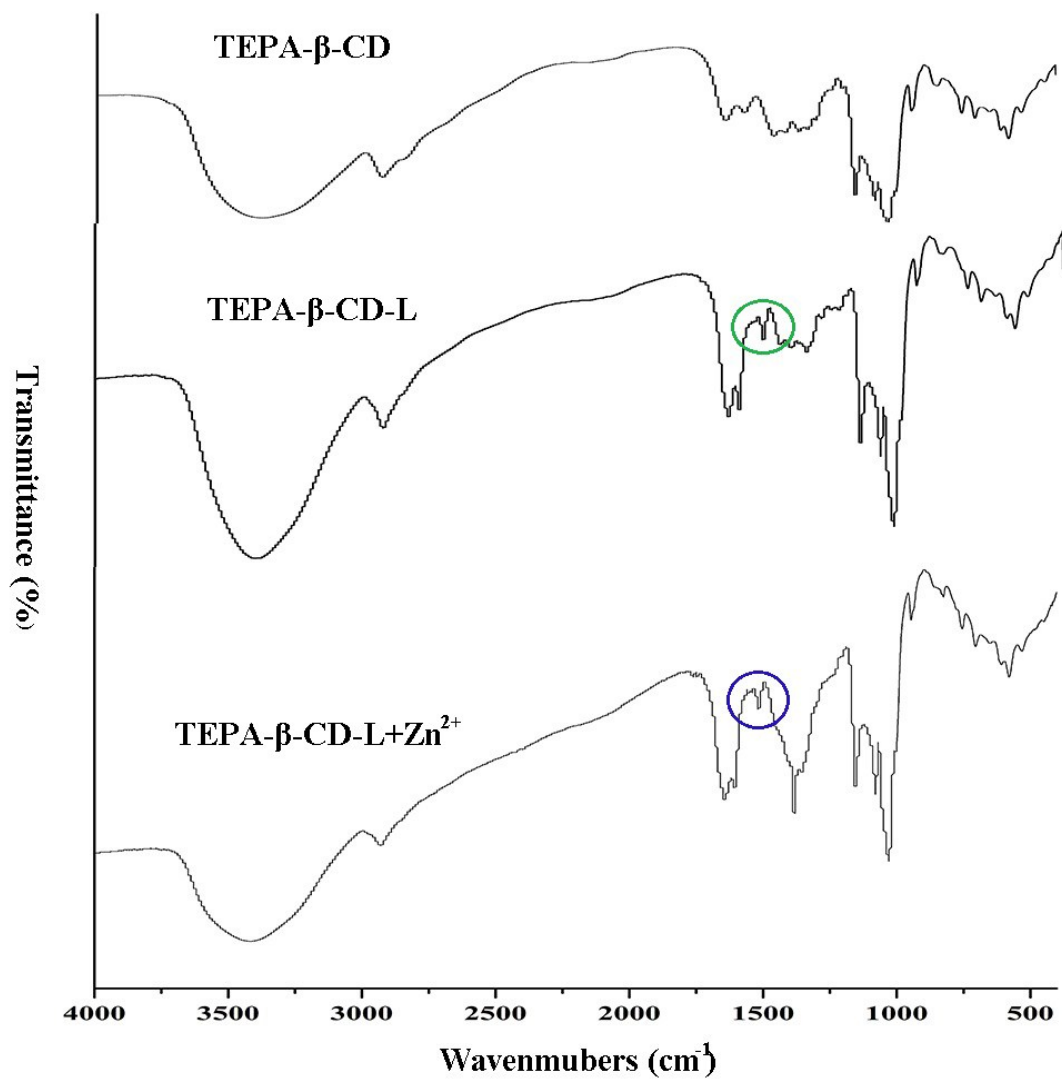

**Fig. S4** The IR spectra of TEPA-β-CD, TEPA-β-CD-L and TEPA-β-CD-L treated with Zn<sup>2+</sup>.

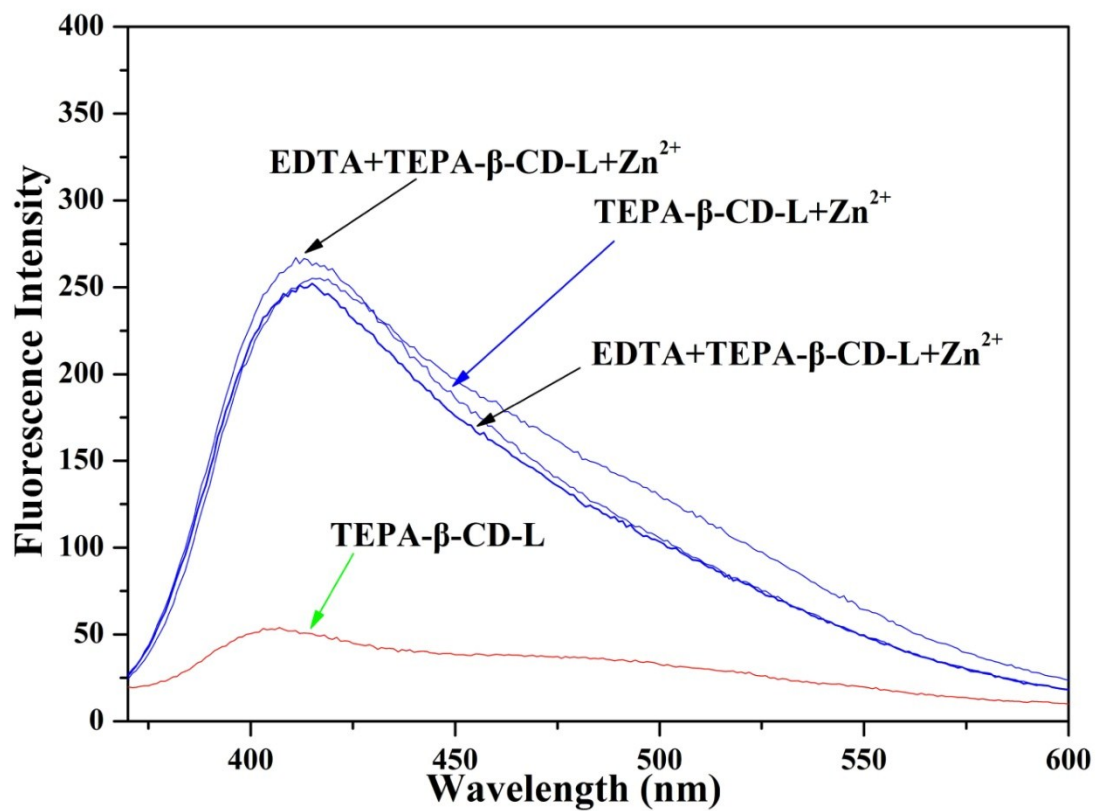

**Fig. S5** The reversibility experiment of TEPA-β-CD-L (0.3 mM) with Zn<sup>2+</sup> (1 mM) in pure water solution, the concentration of EDTA is 1 mM

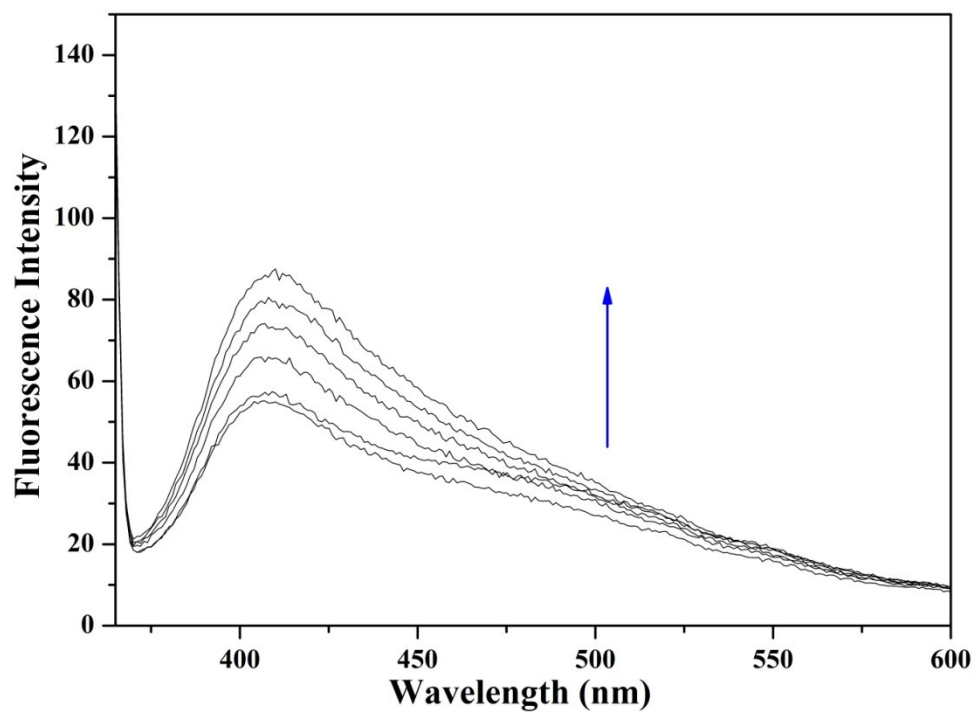

**Fig. S6** The detecting level of TEPA-β-CD-L with Al<sup>3+</sup>
